# Supplementary material for: Ambient temperature correlates with geographic variation in body size of least horseshoe bats
Source: PubMed Central journal article supplement — Curr Zool. 2020 Feb 15;66(5):459–65. doi: 10.1093/cz/zoaa004 (PMC7705506; doi:10.1093/cz/zoaa004), 2020-02-15
Supplement: zoaa004_supplementary_data.pdf [file zoaa004_supplementary_data.pdf]

# **Ambient temperature correlates with geographic variation in body size of least horseshoe bats**

Man WANG<sup>a,b</sup>, Kelly CHEN<sup>c</sup>, Dongge GUO<sup>a</sup>, Bo LUO<sup>a,b,\*</sup>, Weiwei WANG<sup>b</sup>, Huimin GAO<sup>b</sup>, Ying LIU<sup>a</sup>, Jiang FENG<sup>a,d,\*</sup>

<sup>a</sup>Jilin Provincial Key Laboratory of Animal Resource Conservation and Utilization, Northeast Normal University, 2555 Jingyue Street, Changchun 130117, China; <sup>b</sup>Key Laboratory of Southwest China Wildlife Resources Conservation of Ministry of Education, China West Normal University, 1# Shida Road, Nanchong 637009, China; <sup>c</sup>College of Veterinary Medicine, University of Illinois at Champaign-Urbana, 2001 S Lincoln Ave, Urbana, IL, USA; <sup>d</sup>College of Life Science, Jilin Agricultural University, 2888 Xincheng street, Changchun 130118, China.

\*Address correspondence to Bo Luo, E-mail: luob041@nenu.edu.cn, and Jiang Feng, E-mail: fengj@nenu.edu.cn

Handling editor: James Hare

Received on 21 August 2019; accepted on 2 February 2020

**Table S1.** The raw data used in this study

| Colony | Sex    | Season | Fore  | Mass | Head  | Lon    | Lat   | Alt    | T <sub>max</sub> | T <sub>min</sub> | TS   | PS    | ANPP   |
|--------|--------|--------|-------|------|-------|--------|-------|--------|------------------|------------------|------|-------|--------|
| AH     | Male   | Spring | 39.48 | 5.74 | 38.06 | 118.13 | 31.62 | 74.00  | 32.90            | -0.80            | 9.20 | 50.42 | 516.40 |
| AH     | Male   | Spring | 38.99 | 5.97 | 40.47 | 118.13 | 31.62 | 74.00  | 32.90            | -0.80            | 9.20 | 50.42 | 516.40 |
| AH     | Male   | Spring | 37.67 | 5.14 | 40.44 | 118.13 | 31.62 | 74.00  | 32.90            | -0.80            | 9.20 | 50.42 | 516.40 |
| AH     | Male   | Spring | 38.53 | 5.65 | 42.19 | 118.13 | 31.62 | 74.00  | 32.90            | -0.80            | 9.20 | 50.42 | 516.40 |
| AH     | Male   | Spring | 39.09 | 5.68 | 43.81 | 118.13 | 31.62 | 74.00  | 32.90            | -0.80            | 9.20 | 50.42 | 516.40 |
| AH     | Male   | Spring | 39.10 | 5.80 | 41.24 | 118.13 | 31.62 | 74.00  | 32.90            | -0.80            | 9.20 | 50.42 | 516.40 |
| AH     | Male   | Spring | 37.79 | 4.71 | 41.21 | 118.13 | 31.62 | 74.00  | 32.90            | -0.80            | 9.20 | 50.42 | 516.40 |
| AH     | Female | Spring | 38.45 | 5.07 | 37.83 | 118.13 | 31.62 | 74.00  | 32.90            | -0.80            | 9.20 | 50.42 | 516.40 |
| AH     | Female | Spring | 38.35 | 4.81 | 36.93 | 118.13 | 31.62 | 74.00  | 32.90            | -0.80            | 9.20 | 50.42 | 516.40 |
| AH     | Female | Spring | 40.41 | 5.10 | 37.53 | 118.13 | 31.62 | 74.00  | 32.90            | -0.80            | 9.20 | 50.42 | 516.40 |
| AH     | Female | Spring | 40.14 | 5.16 | 38.69 | 118.13 | 31.62 | 74.00  | 32.90            | -0.80            | 9.20 | 50.42 | 516.40 |
| AH     | Female | Spring | 38.66 | 4.50 | 35.38 | 118.13 | 31.62 | 74.00  | 32.90            | -0.80            | 9.20 | 50.42 | 516.40 |
| FJ     | Male   | Spring | 38.35 | 3.80 | 30.22 | 119.73 | 25.44 | 43.00  | 30.70            | 9.10             | 6.18 | 64.19 | 343.60 |
| FJ     | Male   | Spring | 36.28 | 3.60 | 32.99 | 119.73 | 25.44 | 43.00  | 30.70            | 9.10             | 6.18 | 64.19 | 343.60 |
| FJ     | Male   | Spring | 36.08 | 3.50 | 32.30 | 119.73 | 25.44 | 43.00  | 30.70            | 9.10             | 6.18 | 64.19 | 343.60 |
| FJ     | Male   | Spring | 36.01 | 3.50 | 30.20 | 119.73 | 25.44 | 43.00  | 30.70            | 9.10             | 6.18 | 64.19 | 343.60 |
| FJ     | Male   | Spring | 37.69 | 3.50 | 33.69 | 119.73 | 25.44 | 43.00  | 30.70            | 9.10             | 6.18 | 64.19 | 343.60 |
| FJ     | Male   | Spring | 37.28 | 3.50 | 32.06 | 119.73 | 25.44 | 43.00  | 30.70            | 9.10             | 6.18 | 64.19 | 343.60 |
| FJ     | Male   | Spring | 36.30 | 3.70 | 32.66 | 119.73 | 25.44 | 43.00  | 30.70            | 9.10             | 6.18 | 64.19 | 343.60 |
| FJ     | Male   | Spring | 35.28 | 3.60 | 32.41 | 119.73 | 25.44 | 43.00  | 30.70            | 9.10             | 6.18 | 64.19 | 343.60 |
| FJ     | Male   | Spring | 36.33 | 3.40 | 33.95 | 119.73 | 25.44 | 43.00  | 30.70            | 9.10             | 6.18 | 64.19 | 343.60 |
| FJ     | Male   | Spring | 36.25 | 3.90 | 33.61 | 119.73 | 25.44 | 43.00  | 30.70            | 9.10             | 6.18 | 64.19 | 343.60 |
| FJ     | Female | Spring | 37.39 | 3.40 | 30.76 | 119.73 | 25.44 | 43.00  | 30.70            | 9.10             | 6.18 | 64.19 | 343.60 |
| FJ     | Female | Spring | 35.49 | 3.70 | 30.72 | 119.73 | 25.44 | 43.00  | 30.70            | 9.10             | 6.18 | 64.19 | 343.60 |
| FJ     | Female | Spring | 31.71 | 3.60 | 31.06 | 119.73 | 25.44 | 43.00  | 30.70            | 9.10             | 6.18 | 64.19 | 343.60 |
| FJ     | Female | Spring | 37.55 | 3.70 | 32.88 | 119.73 | 25.44 | 43.00  | 30.70            | 9.10             | 6.18 | 64.19 | 343.60 |
| FJ     | Female | Spring | 36.80 | 3.60 | 31.97 | 119.73 | 25.44 | 43.00  | 30.70            | 9.10             | 6.18 | 64.19 | 343.60 |
| FJ     | Female | Spring | 37.14 | 3.50 | 29.71 | 119.73 | 25.44 | 43.00  | 30.70            | 9.10             | 6.18 | 64.19 | 343.60 |
| FJ     | Female | Spring | 37.11 | 3.50 | 29.34 | 119.73 | 25.44 | 43.00  | 30.70            | 9.10             | 6.18 | 64.19 | 343.60 |
| FJ     | Female | Spring | 38.06 | 3.70 | 30.87 | 119.73 | 25.44 | 43.00  | 30.70            | 9.10             | 6.18 | 64.19 | 343.60 |
| FJ     | Female | Spring | 36.33 | 3.50 | 32.14 | 119.73 | 25.44 | 43.00  | 30.70            | 9.10             | 6.18 | 64.19 | 343.60 |
| FJ     | Female | Spring | 37.54 | 4.40 | 33.14 | 119.73 | 25.44 | 43.00  | 30.70            | 9.10             | 6.18 | 64.19 | 343.60 |
| GX     | Male   | Spring | 36.00 | 3.50 | 31.00 | 108.06 | 22.90 | 417.00 | 33.80            | 8.90             | 6.10 | 88.58 | 521.30 |
| GX     | Male   | Spring | 37.00 | 3.20 | 30.00 | 108.06 | 22.90 | 417.00 | 33.80            | 8.90             | 6.10 | 88.58 | 521.30 |
| GX     | Male   | Spring | 38.50 | 3.60 | 31.00 | 108.06 | 22.90 | 417.00 | 33.80            | 8.90             | 6.10 | 88.58 | 521.30 |
| GX     | Male   | Spring | 35.00 | 3.70 | 33.00 | 108.06 | 22.90 | 417.00 | 33.80            | 8.90             | 6.10 | 88.58 | 521.30 |
| GX     | Male   | Spring | 37.00 | 4.30 | 35.00 | 108.06 | 22.90 | 417.00 | 33.80            | 8.90             | 6.10 | 88.58 | 521.30 |
| GX     | Male   | Spring | 35.00 | 3.10 | 32.00 | 108.06 | 22.90 | 417.00 | 33.80            | 8.90             | 6.10 | 88.58 | 521.30 |
| GX     | Male   | Spring | 36.00 | 4.10 | 33.00 | 108.06 | 22.90 | 417.00 | 33.80            | 8.90             | 6.10 | 88.58 | 521.30 |
| GX     | Male   | Spring | 36.00 | 3.80 | 32.00 | 108.06 | 22.90 | 417.00 | 33.80            | 8.90             | 6.10 | 88.58 | 521.30 |
| GX     | Male   | Spring | 35.45 | 3.57 | 32.01 | 108.06 | 22.90 | 417.00 | 33.80            | 8.90             | 6.10 | 88.58 | 521.30 |
| GX     | Female | Spring | 38.00 | 3.80 | 32.00 | 108.06 | 22.90 | 417.00 | 33.80            | 8.90             | 6.10 | 88.58 | 521.30 |
| GX     | Female | Spring | 38.00 | 3.70 | 31.00 | 108.06 | 22.90 | 417.00 | 33.80            | 8.90             | 6.10 | 88.58 | 521.30 |
| GX     | Female | Spring | 39.00 | 3.70 | 35.00 | 108.06 | 22.90 | 417.00 | 33.80            | 8.90             | 6.10 | 88.58 | 521.30 |

|    |        |        |       |      |       |        |       |        |       |       |      |       |        |
|----|--------|--------|-------|------|-------|--------|-------|--------|-------|-------|------|-------|--------|
| GX | Female | Spring | 37.00 | 3.60 | 30.00 | 108.06 | 22.90 | 417.00 | 33.80 | 8.90  | 6.10 | 88.58 | 521.30 |
| GX | Female | Spring | 38.00 | 4.00 | 33.00 | 108.06 | 22.90 | 417.00 | 33.80 | 8.90  | 6.10 | 88.58 | 521.30 |
| GX | Female | Spring | 37.00 | 4.30 | 31.00 | 108.06 | 22.90 | 417.00 | 33.80 | 8.90  | 6.10 | 88.58 | 521.30 |
| GX | Female | Spring | 36.00 | 4.10 | 32.00 | 108.06 | 22.90 | 417.00 | 33.80 | 8.90  | 6.10 | 88.58 | 521.30 |
| GX | Female | Spring | 38.00 | 4.60 | 33.00 | 108.06 | 22.90 | 417.00 | 33.80 | 8.90  | 6.10 | 88.58 | 521.30 |
| GX | Female | Spring | 37.00 | 4.70 | 35.00 | 108.06 | 22.90 | 417.00 | 33.80 | 8.90  | 6.10 | 88.58 | 521.30 |
| GX | Female | Spring | 38.00 | 4.80 | 34.00 | 108.06 | 22.90 | 417.00 | 33.80 | 8.90  | 6.10 | 88.58 | 521.30 |
| GX | Female | Spring | 36.46 | 4.10 | 30.15 | 108.06 | 22.90 | 417.00 | 33.80 | 8.90  | 6.10 | 88.58 | 521.30 |
| GZ | Male   | Spring | 37.50 | 3.30 | 34.00 | 105.97 | 26.24 | 970.00 | 26.50 | 1.20  | 6.46 | 74.36 | 508.10 |
| GZ | Male   | Spring | 37.50 | 4.30 | 30.00 | 105.97 | 26.24 | 970.00 | 26.50 | 1.20  | 6.46 | 74.36 | 508.10 |
| GZ | Male   | Spring | 38.00 | 4.10 | 31.00 | 105.97 | 26.24 | 970.00 | 26.50 | 1.20  | 6.46 | 74.36 | 508.10 |
| GZ | Male   | Spring | 37.50 | 4.40 | 32.00 | 105.97 | 26.24 | 970.00 | 26.50 | 1.20  | 6.46 | 74.36 | 508.10 |
| GZ | Male   | Spring | 38.00 | 4.30 | 32.00 | 105.97 | 26.24 | 970.00 | 26.50 | 1.20  | 6.46 | 74.36 | 508.10 |
| GZ | Male   | Spring | 38.00 | 4.10 | 32.00 | 105.97 | 26.24 | 970.00 | 26.50 | 1.20  | 6.46 | 74.36 | 508.10 |
| GZ | Male   | Spring | 38.00 | 4.20 | 33.00 | 105.97 | 26.24 | 970.00 | 26.50 | 1.20  | 6.46 | 74.36 | 508.10 |
| GZ | Male   | Spring | 37.00 | 4.40 | 32.00 | 105.97 | 26.24 | 970.00 | 26.50 | 1.20  | 6.46 | 74.36 | 508.10 |
| GZ | Male   | Spring | 37.00 | 4.70 | 33.00 | 105.97 | 26.24 | 970.00 | 26.50 | 1.20  | 6.46 | 74.36 | 508.10 |
| GZ | Male   | Spring | 38.50 | 4.40 | 32.00 | 105.97 | 26.24 | 970.00 | 26.50 | 1.20  | 6.46 | 74.36 | 508.10 |
| GZ | Male   | Spring | 38.00 | 4.10 | 32.00 | 105.97 | 26.24 | 970.00 | 26.50 | 1.20  | 6.46 | 74.36 | 508.10 |
| GZ | Male   | Spring | 38.00 | 4.20 | 31.00 | 105.97 | 26.24 | 970.00 | 26.50 | 1.20  | 6.46 | 74.36 | 508.10 |
| GZ | Male   | Spring | 38.00 | 4.30 | 32.00 | 105.97 | 26.24 | 970.00 | 26.50 | 1.20  | 6.46 | 74.36 | 508.10 |
| GZ | Male   | Spring | 35.55 | 3.90 | 35.44 | 105.97 | 26.24 | 970.00 | 26.50 | 1.20  | 6.46 | 74.36 | 508.10 |
| GZ | Male   | Spring | 36.65 | 4.60 | 31.67 | 105.97 | 26.24 | 970.00 | 26.50 | 1.20  | 6.46 | 74.36 | 508.10 |
| GZ | Male   | Spring | 36.88 | 3.90 | 33.72 | 105.97 | 26.24 | 970.00 | 26.50 | 1.20  | 6.46 | 74.36 | 508.10 |
| GZ | Male   | Spring | 36.26 | 4.60 | 30.62 | 105.97 | 26.24 | 970.00 | 26.50 | 1.20  | 6.46 | 74.36 | 508.10 |
| GZ | Female | Spring | 37.00 | 4.70 | 32.00 | 105.97 | 26.24 | 970.00 | 26.50 | 1.20  | 6.46 | 74.36 | 508.10 |
| HN | Male   | Spring | 40.12 | 4.95 | 38.98 | 115.27 | 31.88 | 122.00 | 32.30 | -1.60 | 9.01 | 58.69 | 402.50 |
| HN | Male   | Spring | 39.52 | 5.37 | 39.84 | 115.27 | 31.88 | 122.00 | 32.30 | -1.60 | 9.01 | 58.69 | 402.50 |
| HN | Male   | Spring | 39.96 | 5.52 | 39.94 | 115.27 | 31.88 | 122.00 | 32.30 | -1.60 | 9.01 | 58.69 | 402.50 |
| HN | Male   | Spring | 39.23 | 5.19 | 41.46 | 115.27 | 31.88 | 122.00 | 32.30 | -1.60 | 9.01 | 58.69 | 402.50 |
| HN | Male   | Spring | 38.36 | 5.62 | 40.48 | 115.27 | 31.88 | 122.00 | 32.30 | -1.60 | 9.01 | 58.69 | 402.50 |
| HN | Female | Spring | 40.73 | 5.53 | 38.81 | 115.27 | 31.88 | 122.00 | 32.30 | -1.60 | 9.01 | 58.69 | 402.50 |
| HN | Female | Spring | 40.83 | 5.99 | 40.39 | 115.27 | 31.88 | 122.00 | 32.30 | -1.60 | 9.01 | 58.69 | 402.50 |
| HN | Female | Spring | 40.03 | 5.96 | 37.75 | 115.27 | 31.88 | 122.00 | 32.30 | -1.60 | 9.01 | 58.69 | 402.50 |
| HN | Female | Spring | 40.40 | 5.90 | 36.84 | 115.27 | 31.88 | 122.00 | 32.30 | -1.60 | 9.01 | 58.69 | 402.50 |
| HN | Female | Spring | 40.35 | 5.96 | 34.62 | 115.27 | 31.88 | 122.00 | 32.30 | -1.60 | 9.01 | 58.69 | 402.50 |
| HN | Female | Summer | 39.14 | 5.91 | 41.19 | 115.27 | 31.88 | 122.00 | 32.30 | -1.60 | 9.01 | 58.69 | 402.50 |
| HN | Female | Summer | 39.90 | 6.21 | 40.37 | 115.27 | 31.88 | 122.00 | 32.30 | -1.60 | 9.01 | 58.69 | 402.50 |
| HN | Female | Summer | 38.57 | 5.81 | 39.03 | 115.27 | 31.88 | 122.00 | 32.30 | -1.60 | 9.01 | 58.69 | 402.50 |
| HN | Female | Summer | 38.97 | 5.82 | 42.55 | 115.27 | 31.88 | 122.00 | 32.30 | -1.60 | 9.01 | 58.69 | 402.50 |
| HN | Female | Summer | 38.92 | 5.87 | 39.20 | 115.27 | 31.88 | 122.00 | 32.30 | -1.60 | 9.01 | 58.69 | 402.50 |
| HN | Female | Summer | 40.43 | 5.29 | 40.72 | 115.27 | 31.88 | 122.00 | 32.30 | -1.60 | 9.01 | 58.69 | 402.50 |
| HN | Female | Summer | 38.99 | 5.93 | 40.33 | 115.27 | 31.88 | 122.00 | 32.30 | -1.60 | 9.01 | 58.69 | 402.50 |
| HN | Female | Summer | 39.47 | 6.15 | 42.80 | 115.27 | 31.88 | 122.00 | 32.30 | -1.60 | 9.01 | 58.69 | 402.50 |
| HB | Male   | Summer | 39.24 | 5.15 | 37.54 | 115.73 | 30.71 | 310.00 | 31.70 | -1.00 | 8.59 | 74.87 | 549.40 |
| HB | Male   | Summer | 38.66 | 4.56 | 37.97 | 115.73 | 30.71 | 310.00 | 31.70 | -1.00 | 8.59 | 74.87 | 549.40 |
| HB | Female | Summer | 39.75 | 5.19 | 37.89 | 115.73 | 30.71 | 310.00 | 31.70 | -1.00 | 8.59 | 74.87 | 549.40 |

|    |        |        |       |      |       |        |       |        |       |       |       |       |        |
|----|--------|--------|-------|------|-------|--------|-------|--------|-------|-------|-------|-------|--------|
| HB | Female | Summer | 39.32 | 5.72 | 37.63 | 115.73 | 30.71 | 310.00 | 31.70 | -1.00 | 8.59  | 74.87 | 549.40 |
| HB | Female | Summer | 39.09 | 5.47 | 37.71 | 115.73 | 30.71 | 310.00 | 31.70 | -1.00 | 8.59  | 74.87 | 549.40 |
| HB | Female | Summer | 38.84 | 5.39 | 40.04 | 115.73 | 30.71 | 310.00 | 31.70 | -1.00 | 8.59  | 74.87 | 549.40 |
| HB | Female | Summer | 39.88 | 5.44 | 39.23 | 115.73 | 30.71 | 310.00 | 31.70 | -1.00 | 8.59  | 74.87 | 549.40 |
| HB | Female | Summer | 39.22 | 5.78 | 40.23 | 115.73 | 30.71 | 310.00 | 31.70 | -1.00 | 8.59  | 74.87 | 549.40 |
| HB | Female | Summer | 38.58 | 4.76 | 37.30 | 115.73 | 30.71 | 310.00 | 31.70 | -1.00 | 8.59  | 74.87 | 549.40 |
| HB | Female | Summer | 38.92 | 5.06 | 37.22 | 115.73 | 30.71 | 310.00 | 31.70 | -1.00 | 8.59  | 74.87 | 549.40 |
| JS | Male   | Spring | 37.60 | 4.24 | 36.88 | 118.88 | 31.90 | 310.00 | 32.90 | -1.50 | 9.34  | 50.83 | 577.10 |
| JS | Male   | Spring | 39.92 | 4.66 | 34.35 | 118.88 | 31.90 | 310.00 | 32.90 | -1.50 | 9.34  | 50.83 | 577.10 |
| JS | Male   | Spring | 38.30 | 4.53 | 36.23 | 118.88 | 31.90 | 310.00 | 32.90 | -1.50 | 9.34  | 50.83 | 577.10 |
| JS | Male   | Spring | 38.46 | 4.18 | 32.48 | 118.88 | 31.90 | 310.00 | 32.90 | -1.50 | 9.34  | 50.83 | 577.10 |
| JS | Male   | Spring | 38.43 | 4.35 | 33.44 | 118.88 | 31.90 | 310.00 | 32.90 | -1.50 | 9.34  | 50.83 | 577.10 |
| JS | Male   | Spring | 37.17 | 4.12 | 34.68 | 118.88 | 31.90 | 310.00 | 32.90 | -1.50 | 9.34  | 50.83 | 577.10 |
| JS | Female | Autumn | 39.92 | 6.54 | 36.60 | 118.88 | 31.90 | 235.00 | 32.90 | -1.50 | 9.34  | 50.83 | 577.10 |
| JS | Female | Autumn | 39.22 | 6.63 | 40.41 | 118.88 | 31.90 | 235.00 | 32.90 | -1.50 | 9.34  | 50.83 | 577.10 |
| JS | Female | Autumn | 39.70 | 6.55 | 37.02 | 118.88 | 31.90 | 235.00 | 32.90 | -1.50 | 9.34  | 50.83 | 577.10 |
| JS | Female | Autumn | 38.67 | 5.70 | 41.42 | 118.88 | 31.90 | 235.00 | 32.90 | -1.50 | 9.34  | 50.83 | 577.10 |
| JS | Female | Autumn | 38.60 | 5.51 | 40.23 | 118.88 | 31.90 | 235.00 | 32.90 | -1.50 | 9.34  | 50.83 | 577.10 |
| JS | Female | Autumn | 38.75 | 6.52 | 41.74 | 118.88 | 31.90 | 235.00 | 32.90 | -1.50 | 9.34  | 50.83 | 577.10 |
| JS | Female | Autumn | 38.00 | 6.48 | 39.05 | 118.88 | 31.90 | 235.00 | 32.90 | -1.50 | 9.34  | 50.83 | 577.10 |
| JS | Female | Autumn | 39.15 | 6.57 | 40.51 | 118.88 | 31.90 | 235.00 | 32.90 | -1.50 | 9.34  | 50.83 | 577.10 |
| JS | Female | Autumn | 37.88 | 6.36 | 42.20 | 118.88 | 31.90 | 235.00 | 32.90 | -1.50 | 9.34  | 50.83 | 577.10 |
| JS | Female | Autumn | 39.40 | 6.19 | 42.10 | 118.88 | 31.90 | 235.00 | 32.90 | -1.50 | 9.34  | 50.83 | 577.10 |
| JS | Female | Autumn | 36.07 | 6.57 | 41.46 | 118.88 | 31.90 | 235.00 | 32.90 | -1.50 | 9.34  | 50.83 | 577.10 |
| JS | Female | Autumn | 38.62 | 6.25 | 41.52 | 118.88 | 31.90 | 235.00 | 32.90 | -1.50 | 9.34  | 50.83 | 577.10 |
| JS | Female | Autumn | 38.36 | 6.20 | 41.24 | 118.88 | 31.90 | 235.00 | 32.90 | -1.50 | 9.34  | 50.83 | 577.10 |
| JS | Female | Autumn | 37.74 | 6.49 | 40.23 | 118.88 | 31.90 | 235.00 | 32.90 | -1.50 | 9.34  | 50.83 | 577.10 |
| JS | Female | Autumn | 40.29 | 5.35 | 40.41 | 118.88 | 31.90 | 235.00 | 32.90 | -1.50 | 9.34  | 50.83 | 577.10 |
| JS | Female | Autumn | 40.60 | 6.60 | 40.41 | 118.88 | 31.90 | 235.00 | 32.90 | -1.50 | 9.34  | 50.83 | 577.10 |
| JS | Female | Autumn | 40.15 | 5.94 | 40.41 | 118.88 | 31.90 | 235.00 | 32.90 | -1.50 | 9.34  | 50.83 | 577.10 |
| JS | Female | Autumn | 39.00 | 4.03 | 40.41 | 118.88 | 31.90 | 235.00 | 32.90 | -1.50 | 9.34  | 50.83 | 577.10 |
| JS | Female | Autumn | 39.09 | 5.80 | 40.41 | 118.88 | 31.90 | 235.00 | 32.90 | -1.50 | 9.34  | 50.83 | 577.10 |
| JS | Female | Autumn | 41.40 | 4.84 | 40.41 | 118.88 | 31.90 | 235.00 | 32.90 | -1.50 | 9.34  | 50.83 | 577.10 |
| JS | Female | Autumn | 40.18 | 3.99 | 40.41 | 118.88 | 31.90 | 235.00 | 32.90 | -1.50 | 9.34  | 50.83 | 577.10 |
| JS | Female | Autumn | 39.07 | 4.88 | 40.41 | 118.88 | 31.90 | 235.00 | 32.90 | -1.50 | 9.34  | 50.83 | 577.10 |
| SD | Male   | Summer | 38.90 | 5.26 | 41.74 | 117.74 | 35.13 | 162.00 | 32.10 | -6.70 | 10.15 | 63.37 | 364.00 |
| SD | Male   | Summer | 38.00 | 5.53 | 43.96 | 117.74 | 35.13 | 162.00 | 32.10 | -6.70 | 10.15 | 63.37 | 364.00 |
| SD | Male   | Summer | 39.03 | 5.61 | 43.97 | 117.74 | 35.13 | 162.00 | 32.10 | -6.70 | 10.15 | 63.37 | 364.00 |
| SD | Male   | Summer | 38.03 | 5.96 | 42.15 | 117.74 | 35.13 | 162.00 | 32.10 | -6.70 | 10.15 | 63.37 | 364.00 |
| SD | Male   | Summer | 38.31 | 5.74 | 42.00 | 117.74 | 35.13 | 162.00 | 32.10 | -6.70 | 10.15 | 63.37 | 364.00 |
| SD | Male   | Summer | 38.34 | 5.97 | 40.04 | 117.74 | 35.13 | 162.00 | 32.10 | -6.70 | 10.15 | 63.37 | 364.00 |
| SD | Male   | Summer | 39.01 | 6.01 | 42.98 | 117.74 | 35.13 | 162.00 | 32.10 | -6.70 | 10.15 | 63.37 | 364.00 |
| SD | Male   | Summer | 39.58 | 5.93 | 41.86 | 117.74 | 35.13 | 162.00 | 32.10 | -6.70 | 10.15 | 63.37 | 364.00 |
| SD | Male   | Summer | 39.68 | 5.74 | 43.19 | 117.74 | 35.13 | 162.00 | 32.10 | -6.70 | 10.15 | 63.37 | 364.00 |
| SD | Male   | Summer | 38.42 | 6.15 | 43.66 | 117.74 | 35.13 | 162.00 | 32.10 | -6.70 | 10.15 | 63.37 | 364.00 |
| SD | Male   | Summer | 39.08 | 6.39 | 41.82 | 117.74 | 35.13 | 162.00 | 32.10 | -6.70 | 10.15 | 63.37 | 364.00 |
| SD | Male   | Summer | 38.78 | 5.96 | 42.05 | 117.74 | 35.13 | 162.00 | 32.10 | -6.70 | 10.15 | 63.37 | 364.00 |

|    |        |        |       |      |       |        |       |         |       |       |       |       |        |
|----|--------|--------|-------|------|-------|--------|-------|---------|-------|-------|-------|-------|--------|
| SD | Male   | Summer | 39.36 | 5.99 | 42.91 | 117.74 | 35.13 | 162.00  | 32.10 | -6.70 | 10.15 | 63.37 | 364.00 |
| SD | Male   | Summer | 39.22 | 5.78 | 41.72 | 117.74 | 35.13 | 162.00  | 32.10 | -6.70 | 10.15 | 63.37 | 364.00 |
| SD | Female | Summer | 38.98 | 6.21 | 43.94 | 117.74 | 35.13 | 162.00  | 32.10 | -6.70 | 10.15 | 63.37 | 364.00 |
| SD | Female | Summer | 38.71 | 5.70 | 42.16 | 117.74 | 35.13 | 162.00  | 32.10 | -6.70 | 10.15 | 63.37 | 364.00 |
| SD | Female | Summer | 38.13 | 6.42 | 41.40 | 117.74 | 35.13 | 162.00  | 32.10 | -6.70 | 10.15 | 63.37 | 364.00 |
| SD | Female | Summer | 40.64 | 6.03 | 42.57 | 117.74 | 35.13 | 162.00  | 32.10 | -6.70 | 10.15 | 63.37 | 364.00 |
| SD | Female | Summer | 38.50 | 5.68 | 44.06 | 117.74 | 35.13 | 162.00  | 32.10 | -6.70 | 10.15 | 63.37 | 364.00 |
| SD | Female | Summer | 39.02 | 5.77 | 43.37 | 117.74 | 35.13 | 162.00  | 32.10 | -6.70 | 10.15 | 63.37 | 364.00 |
| SD | Female | Summer | 40.15 | 6.15 | 42.24 | 117.74 | 35.13 | 162.00  | 32.10 | -6.70 | 10.15 | 63.37 | 364.00 |
| SD | Female | Summer | 38.80 | 5.85 | 40.92 | 117.74 | 35.13 | 162.00  | 32.10 | -6.70 | 10.15 | 63.37 | 364.00 |
| SD | Female | Summer | 38.66 | 5.62 | 42.34 | 117.74 | 35.13 | 162.00  | 32.10 | -6.70 | 10.15 | 63.37 | 364.00 |
| SD | Female | Summer | 39.93 | 5.57 | 42.63 | 117.74 | 35.13 | 162.00  | 32.10 | -6.70 | 10.15 | 63.37 | 364.00 |
| SD | Female | Summer | 38.30 | 5.54 | 42.50 | 117.74 | 35.13 | 162.00  | 32.10 | -6.70 | 10.15 | 63.37 | 364.00 |
| SD | Female | Summer | 41.00 | 5.95 | 42.70 | 117.74 | 35.13 | 162.00  | 32.10 | -6.70 | 10.15 | 63.37 | 364.00 |
| SC | Male   | Summer | 38.87 | 5.29 | 40.00 | 107.74 | 31.20 | 417.00  | 30.00 | 1.40  | 7.83  | 68.39 | 521.60 |
| SC | Male   | Summer | 40.00 | 5.47 | 33.00 | 107.74 | 31.20 | 417.00  | 30.00 | 1.40  | 7.83  | 68.39 | 521.60 |
| SC | Male   | Summer | 39.50 | 5.36 | 35.00 | 107.74 | 31.20 | 417.00  | 30.00 | 1.40  | 7.83  | 68.39 | 521.60 |
| SC | Male   | Summer | 39.50 | 5.23 | 36.00 | 107.74 | 31.20 | 417.00  | 30.00 | 1.40  | 7.83  | 68.39 | 521.60 |
| SC | Male   | Summer | 37.25 | 5.16 | 40.00 | 107.74 | 31.20 | 417.00  | 30.00 | 1.40  | 7.83  | 68.39 | 521.60 |
| SC | Male   | Summer | 37.40 | 4.90 | 40.00 | 107.74 | 31.20 | 417.00  | 30.00 | 1.40  | 7.83  | 68.39 | 521.60 |
| SC | Male   | Summer | 37.80 | 5.30 | 42.00 | 107.74 | 31.20 | 417.00  | 30.00 | 1.40  | 7.83  | 68.39 | 521.60 |
| SC | Male   | Summer | 39.60 | 5.47 | 43.00 | 107.74 | 31.20 | 417.00  | 30.00 | 1.40  | 7.83  | 68.39 | 521.60 |
| SC | Male   | Summer | 40.00 | 5.74 | 44.00 | 107.74 | 31.20 | 417.00  | 30.00 | 1.40  | 7.83  | 68.39 | 521.60 |
| SC | Male   | Summer | 36.80 | 5.11 | 42.00 | 107.74 | 31.20 | 417.00  | 30.00 | 1.40  | 7.83  | 68.39 | 521.60 |
| SC | Male   | Summer | 37.20 | 5.34 | 38.89 | 107.74 | 31.20 | 417.00  | 30.00 | 1.40  | 7.83  | 68.39 | 521.60 |
| SC | Male   | Summer | 37.76 | 4.22 | 38.89 | 107.74 | 31.20 | 417.00  | 30.00 | 1.40  | 7.83  | 68.39 | 521.60 |
| SC | Male   | Summer | 38.39 | 4.79 | 38.89 | 107.74 | 31.20 | 417.00  | 30.00 | 1.40  | 7.83  | 68.39 | 521.60 |
| SC | Male   | Summer | 36.96 | 4.27 | 38.89 | 107.74 | 31.20 | 417.00  | 30.00 | 1.40  | 7.83  | 68.39 | 521.60 |
| SC | Male   | Summer | 36.22 | 4.00 | 38.89 | 107.74 | 31.20 | 417.00  | 30.00 | 1.40  | 7.83  | 68.39 | 521.60 |
| SC | Male   | Summer | 38.57 | 4.98 | 38.89 | 107.74 | 31.20 | 417.00  | 30.00 | 1.40  | 7.83  | 68.39 | 521.60 |
| SC | Male   | Summer | 37.54 | 4.00 | 40.33 | 107.74 | 31.20 | 417.00  | 30.00 | 1.40  | 7.83  | 68.39 | 521.60 |
| SC | Male   | Summer | 37.78 | 3.26 | 33.79 | 107.74 | 31.20 | 417.00  | 30.00 | 1.40  | 7.83  | 68.39 | 521.60 |
| SC | Male   | Summer | 37.19 | 3.79 | 35.40 | 107.74 | 31.20 | 417.00  | 30.00 | 1.40  | 7.83  | 68.39 | 521.60 |
| SC | Male   | Summer | 35.25 | 4.15 | 38.89 | 107.74 | 31.20 | 417.00  | 30.00 | 1.40  | 7.83  | 68.39 | 521.60 |
| SC | Female | Summer | 39.30 | 5.53 | 39.00 | 107.74 | 31.20 | 417.00  | 30.00 | 1.40  | 7.83  | 68.39 | 521.60 |
| SC | Female | Summer | 38.27 | 5.41 | 42.00 | 107.74 | 31.20 | 417.00  | 30.00 | 1.40  | 7.83  | 68.39 | 521.60 |
| SC | Female | Summer | 38.18 | 5.10 | 38.97 | 107.74 | 31.20 | 417.00  | 30.00 | 1.40  | 7.83  | 68.39 | 521.60 |
| YN | Male   | Summer | 35.00 | 3.80 | 30.00 | 102.34 | 24.50 | 2202.00 | 23.10 | 1.90  | 4.37  | 67.49 | 946.60 |
| YN | Male   | Summer | 38.10 | 5.10 | 30.20 | 102.34 | 24.50 | 2202.00 | 23.10 | 1.90  | 4.37  | 67.49 | 946.60 |
| YN | Male   | Summer | 36.50 | 4.75 | 30.40 | 102.34 | 24.50 | 2202.00 | 23.10 | 1.90  | 4.37  | 67.49 | 946.60 |
| YN | Male   | Summer | 35.00 | 3.60 | 34.02 | 102.34 | 24.50 | 2202.00 | 23.10 | 1.90  | 4.37  | 67.49 | 946.60 |
| YN | Male   | Spring | 37.50 | 4.40 | 34.02 | 102.34 | 24.50 | 2202.00 | 23.10 | 1.90  | 4.37  | 67.49 | 946.60 |
| YN | Male   | Spring | 37.50 | 4.10 | 34.00 | 102.34 | 24.50 | 2202.00 | 23.10 | 1.90  | 4.37  | 67.49 | 946.60 |
| YN | Male   | Spring | 37.00 | 4.00 | 35.00 | 102.34 | 24.50 | 2202.00 | 23.10 | 1.90  | 4.37  | 67.49 | 946.60 |
| YN | Male   | Spring | 35.50 | 3.85 | 34.00 | 102.34 | 24.50 | 2202.00 | 23.10 | 1.90  | 4.37  | 67.49 | 946.60 |
| YN | Male   | Spring | 37.00 | 3.80 | 34.00 | 102.34 | 24.50 | 2202.00 | 23.10 | 1.90  | 4.37  | 67.49 | 946.60 |
| YN | Male   | Spring | 38.00 | 4.90 | 34.00 | 102.34 | 24.50 | 2202.00 | 23.10 | 1.90  | 4.37  | 67.49 | 946.60 |

|    |        |        |       |      |       |        |       |         |       |      |      |       |        |
|----|--------|--------|-------|------|-------|--------|-------|---------|-------|------|------|-------|--------|
| YN | Male   | Spring | 37.00 | 3.50 | 33.00 | 102.34 | 24.50 | 2202.00 | 23.10 | 1.90 | 4.37 | 67.49 | 946.60 |
| YN | Male   | Spring | 37.00 | 4.50 | 38.00 | 102.34 | 24.50 | 2202.00 | 23.10 | 1.90 | 4.37 | 67.49 | 946.60 |
| YN | Male   | Spring | 35.00 | 4.90 | 36.00 | 102.34 | 24.50 | 2202.00 | 23.10 | 1.90 | 4.37 | 67.49 | 946.60 |
| YN | Male   | Spring | 36.50 | 3.90 | 34.02 | 102.34 | 24.50 | 2202.00 | 23.10 | 1.90 | 4.37 | 67.49 | 946.60 |
| YN | Male   | Spring | 37.00 | 3.95 | 34.02 | 102.34 | 24.50 | 2202.00 | 23.10 | 1.90 | 4.37 | 67.49 | 946.60 |
| YN | Male   | Spring | 36.00 | 4.50 | 34.02 | 102.34 | 24.50 | 2202.00 | 23.10 | 1.90 | 4.37 | 67.49 | 946.60 |
| YN | Male   | Spring | 35.00 | 4.60 | 34.02 | 102.34 | 24.50 | 2202.00 | 23.10 | 1.90 | 4.37 | 67.49 | 946.60 |
| YN | Male   | Spring | 38.00 | 4.60 | 34.02 | 102.34 | 24.50 | 2202.00 | 23.10 | 1.90 | 4.37 | 67.49 | 946.60 |
| YN | Male   | Spring | 36.00 | 3.55 | 34.02 | 102.34 | 24.50 | 2202.00 | 23.10 | 1.90 | 4.37 | 67.49 | 946.60 |
| YN | Male   | Spring | 38.50 | 4.10 | 34.02 | 102.34 | 24.50 | 2202.00 | 23.10 | 1.90 | 4.37 | 67.49 | 946.60 |
| YN | Male   | Spring | 35.01 | 5.31 | 34.02 | 102.34 | 24.50 | 2202.00 | 23.10 | 1.90 | 4.37 | 67.49 | 946.60 |
| YN | Male   | Spring | 37.00 | 4.90 | 34.02 | 102.34 | 24.50 | 2202.00 | 23.10 | 1.90 | 4.37 | 67.49 | 946.60 |
| YN | Male   | Spring | 37.00 | 5.00 | 34.02 | 102.34 | 24.50 | 2202.00 | 23.10 | 1.90 | 4.37 | 67.49 | 946.60 |
| YN | Male   | Spring | 39.00 | 4.70 | 34.00 | 102.34 | 24.50 | 2202.00 | 23.10 | 1.90 | 4.37 | 67.49 | 946.60 |
| YN | Male   | Spring | 38.00 | 4.50 | 34.00 | 102.34 | 24.50 | 2202.00 | 23.10 | 1.90 | 4.37 | 67.49 | 946.60 |
| YN | Male   | Spring | 38.00 | 4.90 | 36.00 | 102.34 | 24.50 | 2202.00 | 23.10 | 1.90 | 4.37 | 67.49 | 946.60 |
| YN | Male   | Spring | 37.50 | 4.50 | 34.00 | 102.34 | 24.50 | 2202.00 | 23.10 | 1.90 | 4.37 | 67.49 | 946.60 |
| YN | Male   | Spring | 39.00 | 4.30 | 34.02 | 102.34 | 24.50 | 2202.00 | 23.10 | 1.90 | 4.37 | 67.49 | 946.60 |
| YN | Male   | Spring | 38.00 | 4.90 | 36.00 | 102.34 | 24.50 | 2202.00 | 23.10 | 1.90 | 4.37 | 67.49 | 946.60 |
| YN | Male   | Spring | 37.00 | 4.50 | 34.00 | 102.34 | 24.50 | 2202.00 | 23.10 | 1.90 | 4.37 | 67.49 | 946.60 |
| YN | Male   | Spring | 39.00 | 4.30 | 34.02 | 102.34 | 24.50 | 2202.00 | 23.10 | 1.90 | 4.37 | 67.49 | 946.60 |
| YN | Male   | Spring | 38.00 | 4.90 | 36.00 | 102.34 | 24.50 | 2202.00 | 23.10 | 1.90 | 4.37 | 67.49 | 946.60 |
| YN | Male   | Spring | 37.50 | 4.90 | 36.00 | 102.34 | 24.50 | 2202.00 | 23.10 | 1.90 | 4.37 | 67.49 | 946.60 |
| YN | Female | Summer | 38.00 | 4.90 | 36.00 | 102.34 | 24.50 | 2202.00 | 23.10 | 1.90 | 4.37 | 67.49 | 946.60 |
| YN | Female | Summer | 38.50 | 3.50 | 34.00 | 102.34 | 24.50 | 2202.00 | 23.10 | 1.90 | 4.37 | 67.49 | 946.60 |
| YN | Female | Summer | 38.00 | 4.95 | 36.00 | 102.34 | 24.50 | 2202.00 | 23.10 | 1.90 | 4.37 | 67.49 | 946.60 |
| YN | Female | Summer | 36.00 | 4.15 | 35.00 | 102.34 | 24.50 | 2202.00 | 23.10 | 1.90 | 4.37 | 67.49 | 946.60 |
| YN | Female | Summer | 37.00 | 3.60 | 35.00 | 102.34 | 24.50 | 2202.00 | 23.10 | 1.90 | 4.37 | 67.49 | 946.60 |
| YN | Female | Summer | 37.12 | 4.60 | 35.00 | 102.34 | 24.50 | 2202.00 | 23.10 | 1.90 | 4.37 | 67.49 | 946.60 |
| YN | Female | Summer | 37.00 | 5.40 | 35.17 | 102.34 | 24.50 | 2202.00 | 23.10 | 1.90 | 4.37 | 67.49 | 946.60 |
| YN | Female | Summer | 40.00 | 4.00 | 35.17 | 102.34 | 24.50 | 2202.00 | 23.10 | 1.90 | 4.37 | 67.49 | 946.60 |
| YN | Female | Summer | 40.00 | 4.30 | 35.17 | 102.34 | 24.50 | 2202.00 | 23.10 | 1.90 | 4.37 | 67.49 | 946.60 |
| YN | Female | Summer | 38.00 | 4.30 | 35.17 | 102.34 | 24.50 | 2202.00 | 23.10 | 1.90 | 4.37 | 67.49 | 946.60 |
| YN | Female | Summer | 41.00 | 4.30 | 35.17 | 102.34 | 24.50 | 2202.00 | 23.10 | 1.90 | 4.37 | 67.49 | 946.60 |
| YN | Female | Summer | 38.00 | 5.90 | 35.17 | 102.34 | 24.50 | 2202.00 | 23.10 | 1.90 | 4.37 | 67.49 | 946.60 |
| YN | Female | Summer | 39.00 | 4.30 | 35.17 | 102.34 | 24.50 | 2202.00 | 23.10 | 1.90 | 4.37 | 67.49 | 946.60 |
| YN | Female | Summer | 40.00 | 5.90 | 35.17 | 102.34 | 24.50 | 2202.00 | 23.10 | 1.90 | 4.37 | 67.49 | 946.60 |
| YN | Female | Summer | 41.00 | 5.60 | 35.17 | 102.34 | 24.50 | 2202.00 | 23.10 | 1.90 | 4.37 | 67.49 | 946.60 |
| YN | Female | Summer | 39.50 | 5.90 | 35.17 | 102.34 | 24.50 | 2202.00 | 23.10 | 1.90 | 4.37 | 67.49 | 946.60 |
| YN | Female | Summer | 37.50 | 5.50 | 35.17 | 102.34 | 24.50 | 2202.00 | 23.10 | 1.90 | 4.37 | 67.49 | 946.60 |
| ZJ | Male   | Spring | 38.11 | 4.27 | 34.68 | 120.03 | 30.12 | 165.00  | 31.60 | 0.00 | 8.75 | 51.64 | 625.60 |
| ZJ | Male   | Spring | 36.09 | 4.84 | 36.43 | 120.03 | 30.12 | 165.00  | 31.60 | 0.00 | 8.75 | 51.64 | 625.60 |
| ZJ | Male   | Spring | 36.11 | 4.52 | 38.16 | 120.03 | 30.12 | 165.00  | 31.60 | 0.00 | 8.75 | 51.64 | 625.60 |
| ZJ | Male   | Spring | 34.26 | 4.51 | 37.93 | 120.03 | 30.12 | 165.00  | 31.60 | 0.00 | 8.75 | 51.64 | 625.60 |
| ZJ | Male   | Spring | 36.53 | 4.05 | 33.66 | 120.03 | 30.12 | 165.00  | 31.60 | 0.00 | 8.75 | 51.64 | 625.60 |
| ZJ | Female | Spring | 40.59 | 6.49 | 36.47 | 120.03 | 30.12 | 165.00  | 31.60 | 0.00 | 8.75 | 51.64 | 625.60 |

|    |        |        |       |      |       |        |       |        |       |      |      |       |        |
|----|--------|--------|-------|------|-------|--------|-------|--------|-------|------|------|-------|--------|
| ZJ | Female | Spring | 38.86 | 6.63 | 37.72 | 120.03 | 30.12 | 165.00 | 31.60 | 0.00 | 8.75 | 51.64 | 625.60 |
| CQ | Male   | Summer | 38.00 | 4.60 | 32.00 | 107.71 | 29.28 | 307.00 | 30.20 | 2.20 | 7.70 | 65.14 | 753.80 |
| CQ | Male   | Summer | 38.00 | 4.70 | 36.00 | 107.71 | 29.28 | 307.00 | 30.20 | 2.20 | 7.70 | 65.14 | 753.80 |
| CQ | Male   | Summer | 38.00 | 4.90 | 34.00 | 107.71 | 29.28 | 307.00 | 30.20 | 2.20 | 7.70 | 65.14 | 753.80 |
| CQ | Male   | Summer | 38.00 | 4.60 | 37.00 | 107.71 | 29.28 | 307.00 | 30.20 | 2.20 | 7.70 | 65.14 | 753.80 |
| CQ | Male   | Summer | 35.51 | 4.00 | 34.81 | 107.71 | 29.28 | 307.00 | 30.20 | 2.20 | 7.70 | 65.14 | 753.80 |
| CQ | Male   | Summer | 35.67 | 3.60 | 30.30 | 107.71 | 29.28 | 307.00 | 30.20 | 2.20 | 7.70 | 65.14 | 753.80 |
| CQ | Male   | Summer | 37.62 | 4.00 | 32.59 | 107.71 | 29.28 | 307.00 | 30.20 | 2.20 | 7.70 | 65.14 | 753.80 |
| CQ | Male   | Summer | 36.44 | 3.40 | 32.94 | 107.71 | 29.28 | 307.00 | 30.20 | 2.20 | 7.70 | 65.14 | 753.80 |
| CQ | Male   | Summer | 37.00 | 4.80 | 36.00 | 107.71 | 29.28 | 307.00 | 30.20 | 2.20 | 7.70 | 65.14 | 753.80 |
| CQ | Female | Summer | 39.00 | 4.90 | 38.00 | 107.71 | 29.28 | 307.00 | 30.20 | 2.20 | 7.70 | 65.14 | 753.80 |
| CQ | Female | Summer | 35.79 | 3.40 | 32.41 | 107.71 | 29.28 | 307.00 | 30.20 | 2.20 | 7.70 | 65.14 | 753.80 |
| CQ | Female | Summer | 34.57 | 4.20 | 32.98 | 107.71 | 29.28 | 307.00 | 30.20 | 2.20 | 7.70 | 65.14 | 753.80 |
| CQ | Female | Summer | 38.74 | 4.80 | 33.52 | 107.71 | 29.28 | 307.00 | 30.20 | 2.20 | 7.70 | 65.14 | 753.80 |

AH: Anhui colony. CQ: Chongqing colony. FJ: Fujiang colony. GX: Guangxi colony. GZ: Guizhou colony. HB: Hubei colony. HN: Henan colony. JS: Jiangsu colony. SC: Sichuan colony. SD: Shandong colony. YN: Yunnan colony. ZJ: Zhejiang colony. Fore: forearm length (mm). Mass: body mass (g). Head: head-body length (mm). Lon: longitude (°E). Lat: latitude (°N). Alt: altitude (m).  $T_{max}$ : mean maximum temperature of the warmest month (°C).  $T_{min}$ : mean minimum temperature of the coldest month (°C). TS: temperature seasonality. PS: precipitation seasonality. ANPP: annual net primary productivity ( $g\ C\ m^{-2}\ year^{-1}$ ).

**Table S2.** The first five spatial simultaneous autoregressive error models in this study

| Sex    | Dependent variable | Predictors                                           | AICc          |
|--------|--------------------|------------------------------------------------------|---------------|
| Female | Body mass          | <b>T<sub>min</sub></b>                               | <b>211.14</b> |
|        |                    | T <sub>min</sub> + T <sub>max</sub>                  | 212.79        |
|        |                    | T <sub>min</sub> + TS                                | 213.16        |
|        |                    | T <sub>min</sub> + PS                                | 213.36        |
|        |                    | T <sub>min</sub> + ANPP                              | 213.38        |
|        | Head-body length   | <b>T<sub>min</sub> + T<sub>max</sub> + ANPP</b>      | <b>405.04</b> |
|        |                    | T <sub>min</sub> + ANPP                              | 405.63        |
|        |                    | T <sub>min</sub> + T <sub>max</sub>                  | 405.99        |
|        |                    | T <sub>min</sub> + T <sub>max</sub> + PS             | 407.82        |
|        |                    | T <sub>min</sub> + T <sub>max</sub> + TS + PS + ANPP | 407.93        |
| Male   | Body mass          | <b>T<sub>min</sub> + ANPP</b>                        | <b>201.64</b> |
|        |                    | T <sub>min</sub> + T <sub>max</sub> + ANPP           | 202.57        |
|        |                    | T <sub>min</sub> + T <sub>max</sub>                  | 203.80        |
|        |                    | T <sub>min</sub>                                     | 204.52        |
|        |                    | T <sub>min</sub> + TS                                | 204.77        |
|        | Head-body length   | <b>T<sub>min</sub> + T<sub>max</sub> + ANPP</b>      | <b>613.95</b> |
|        |                    | T <sub>min</sub> + T <sub>max</sub> + TS + PS + ANPP | 614.32        |
|        |                    | TS + ANPP                                            | 617.17        |
|        |                    | T <sub>min</sub> + ANPP                              | 618.99        |
|        |                    | T <sub>min</sub> + T <sub>max</sub>                  | 619.62        |

T<sub>min</sub>: mean minimum temperature of the coldest month. T<sub>max</sub>: mean maximum temperature of the warmest month. TS: temperature seasonality. PS: precipitation seasonality. ANPP: annual net primary productivity. AICc: Akaike information criterion corrected for small sample size. The best-fitting models are noted in bold.
